# Supplementary material for: Synthesis and crystal structure of selenocyanato bridged two dimensional supramolecular coordination compounds of cadmium(ii)Electronic supplementary information (ESI) available: Coreyâ€“Paulingâ€“Koltun diagram of 2. See http://www.rsc.org/suppdata/dt/b1/b101064f/
Source: Royal Society of Chemistry journal article supplement (doi:10.1039/b101064f), 2001-10-11
Supplement: b101064f.doc [file b101064f.doc]

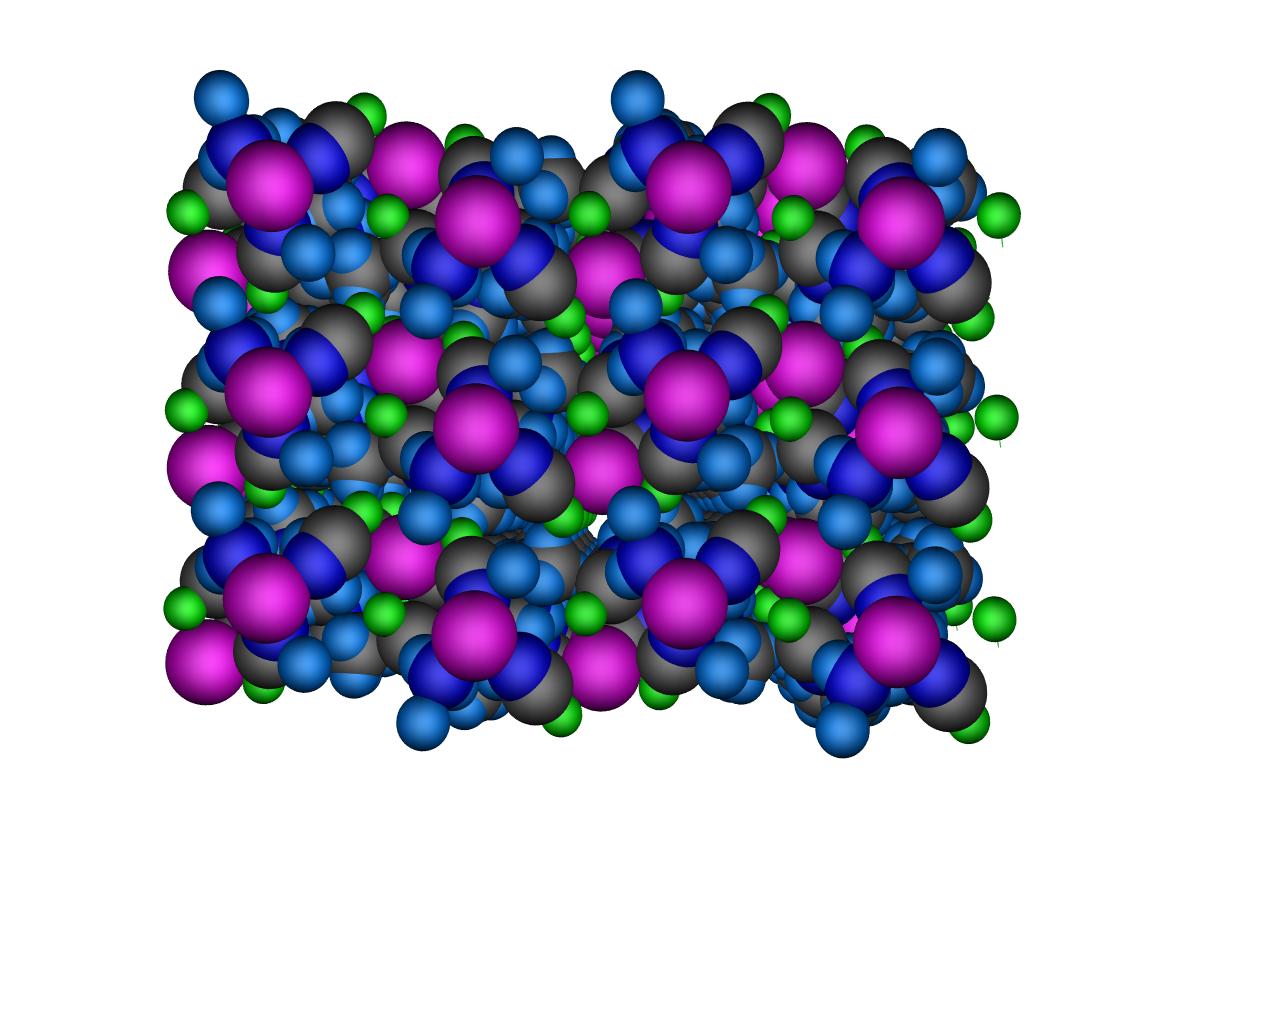


**Fig.6 CPK diagram of complex 2 showing no cavities**. **colour code : Cd - magenta, Se-cyan, C-gray, N-navy blue, H- summer-sky blue**
